# Supplementary material
Source: PubMed Central journal article supplement (PMC3415855)

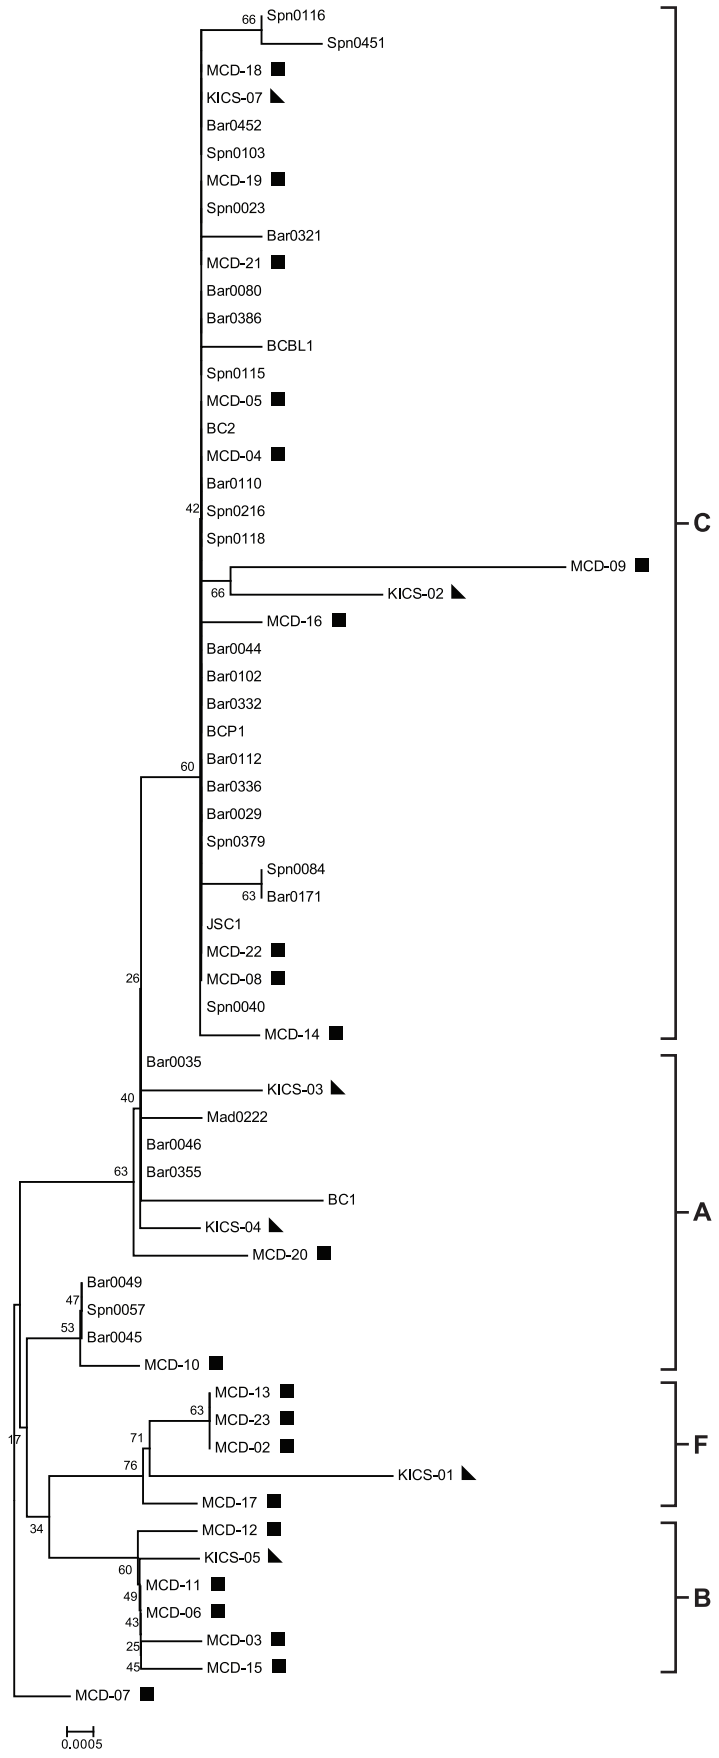

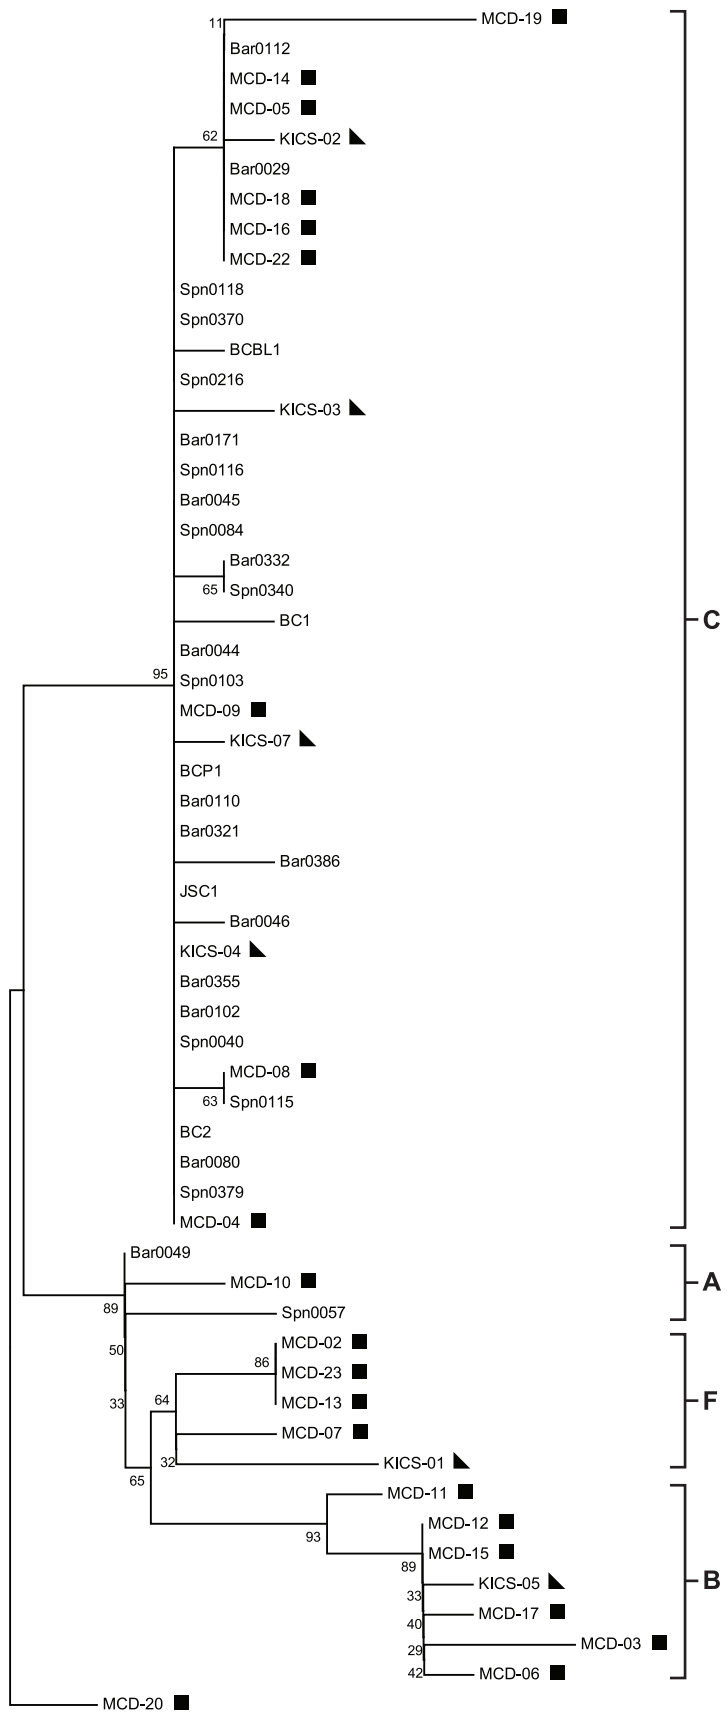

0.001

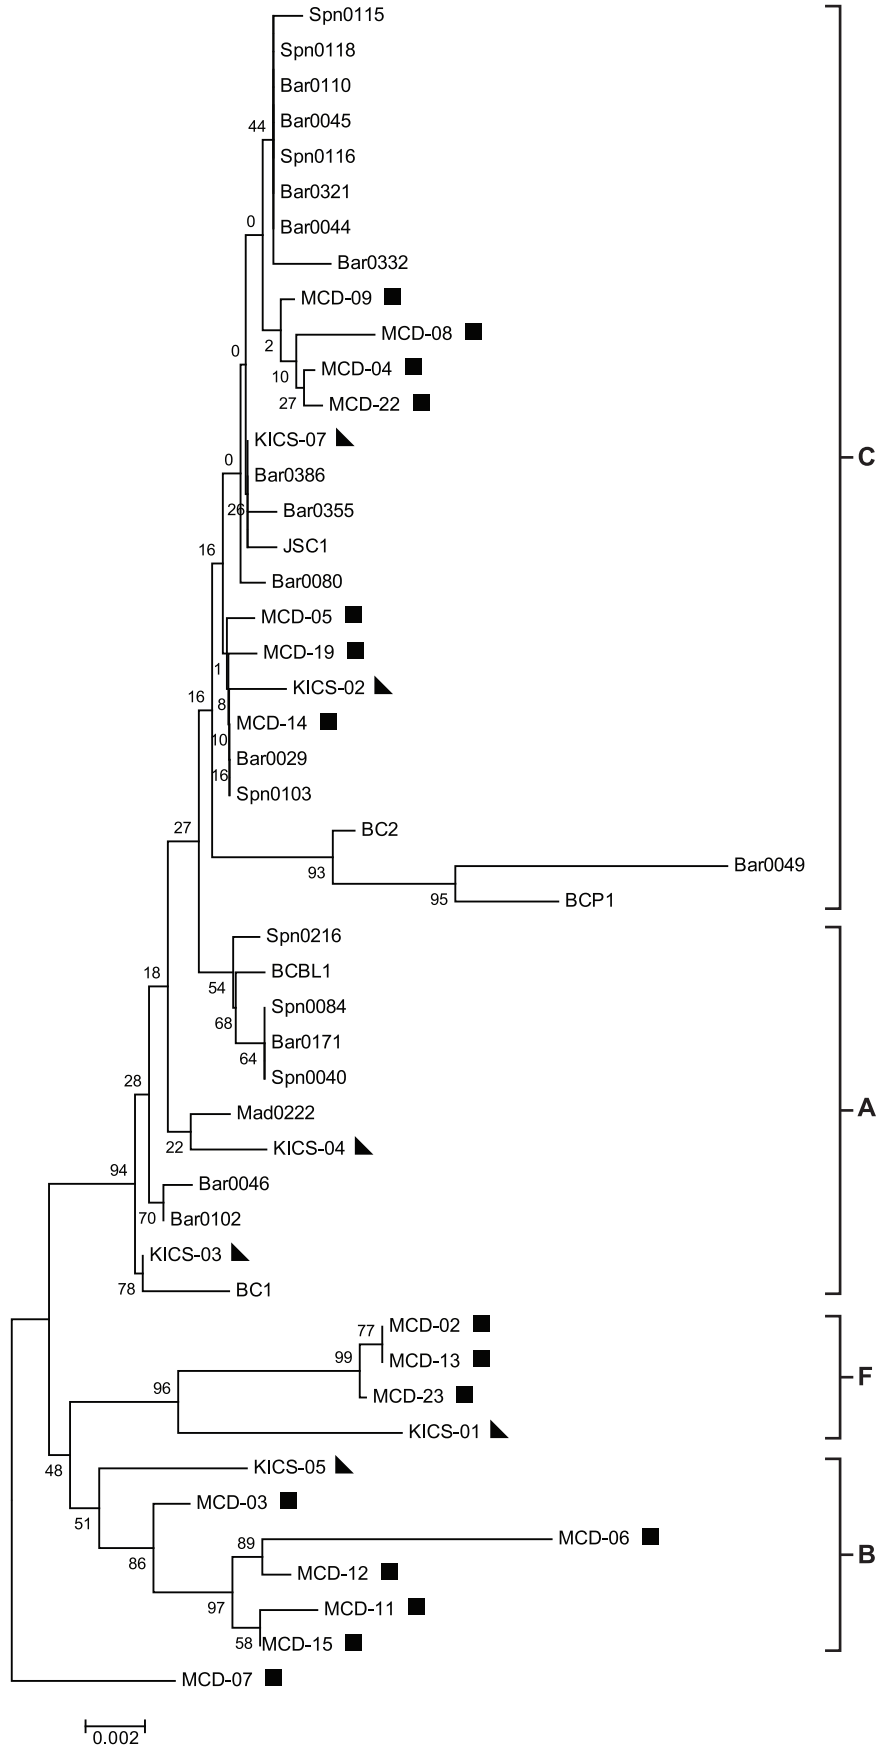

**Percent of Patients with SNPs in T0.7 Region  
KSHV-MCD, KICS, AIDS-KS, KSHV-Controls**

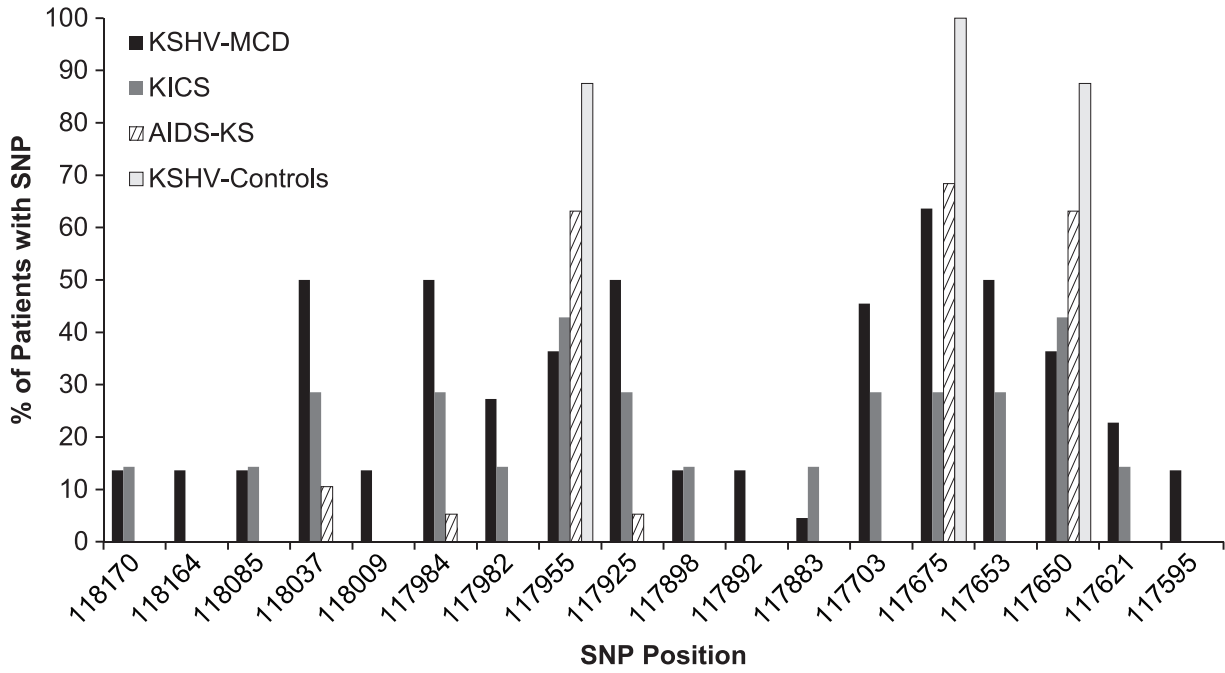

**Percent of Patients with SNPs in miRs 1-5 Region  
KSHV-MCD, KICS, AIDS-KS, KSHV-Controls**

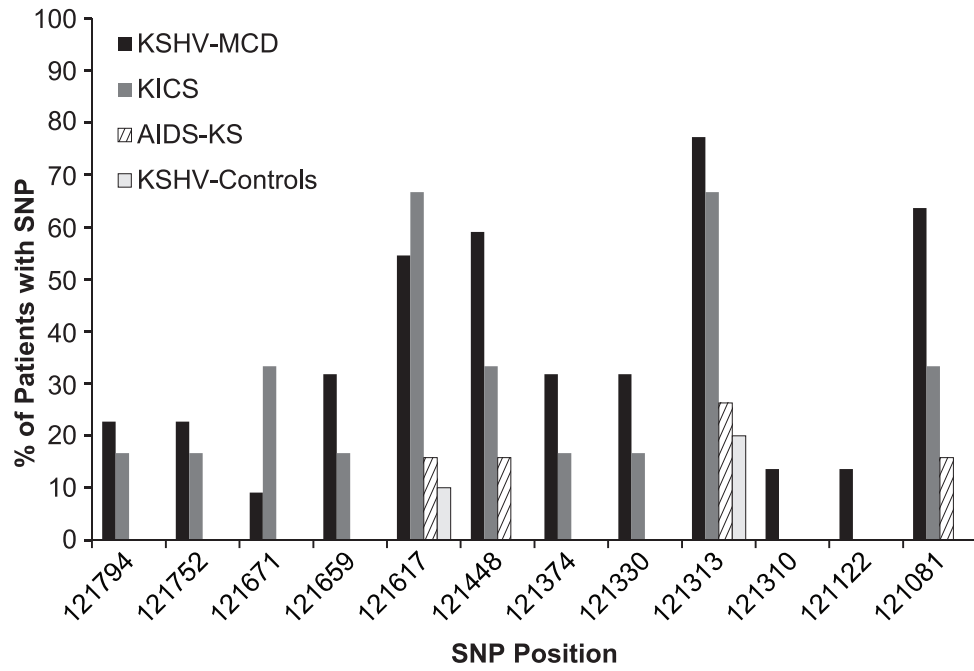

**Percent of Patients with SNPs in miRs 6, 11, 7 Region  
KSHV-MCD, KICS, AIDS-KS, KSHV-Controls**

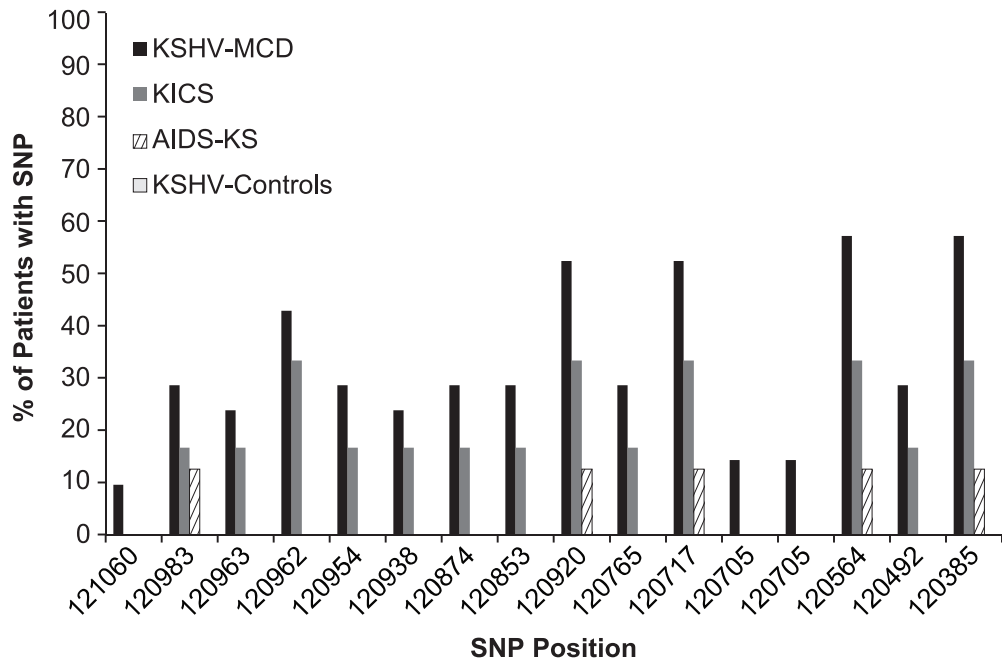

**Percent of Patients with SNPs in miRs 7-9 Region  
KSHV-MCD, KICS, AIDS-KS, KSHV-Controls**

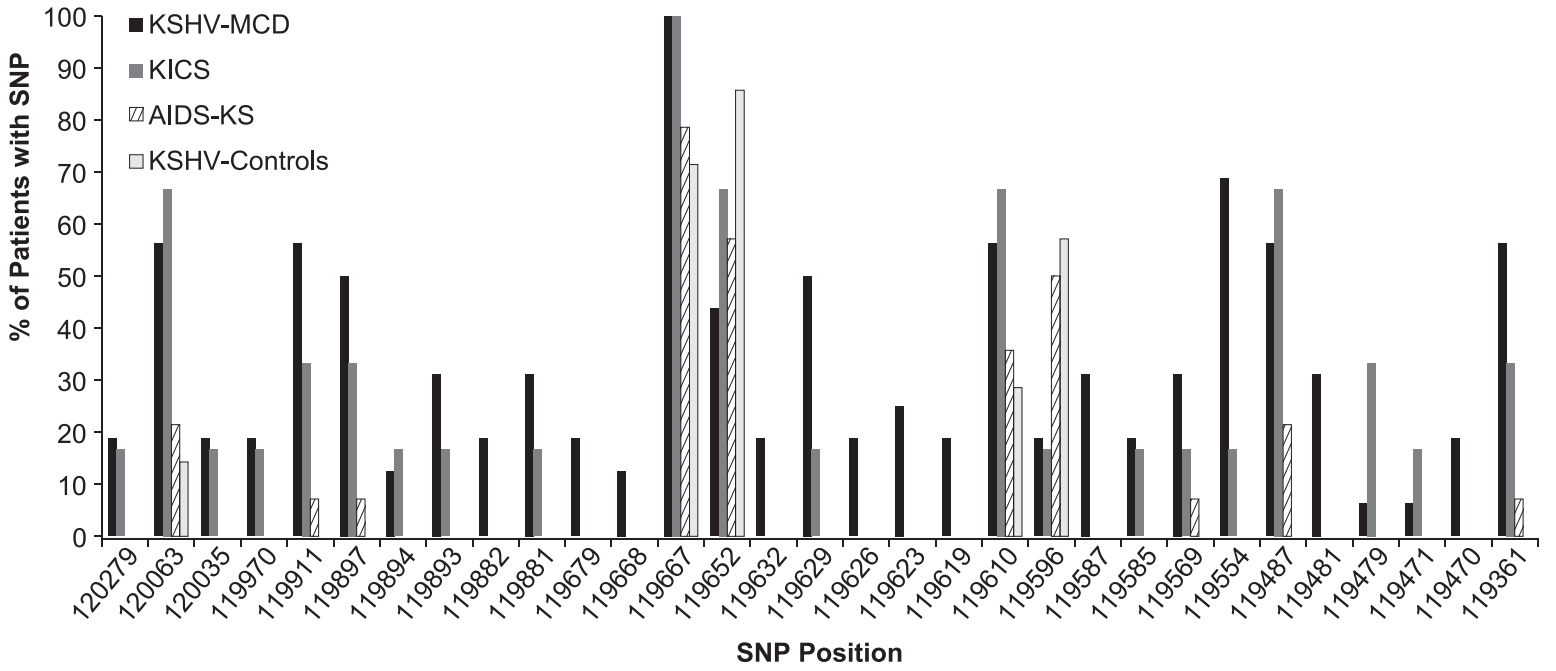

**Tree model 1**

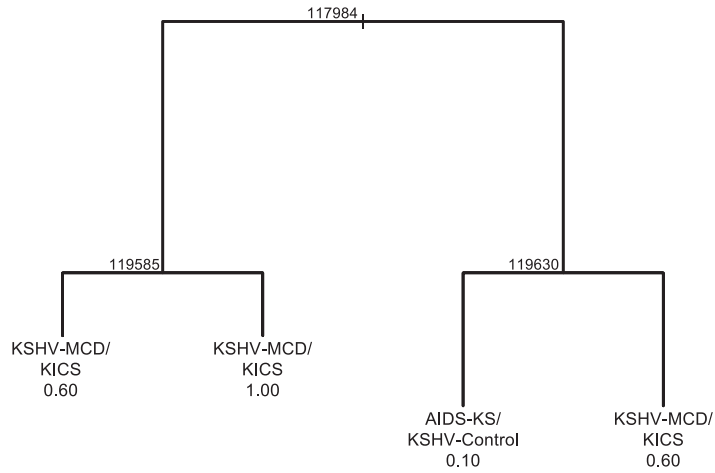

**Tree model 2**

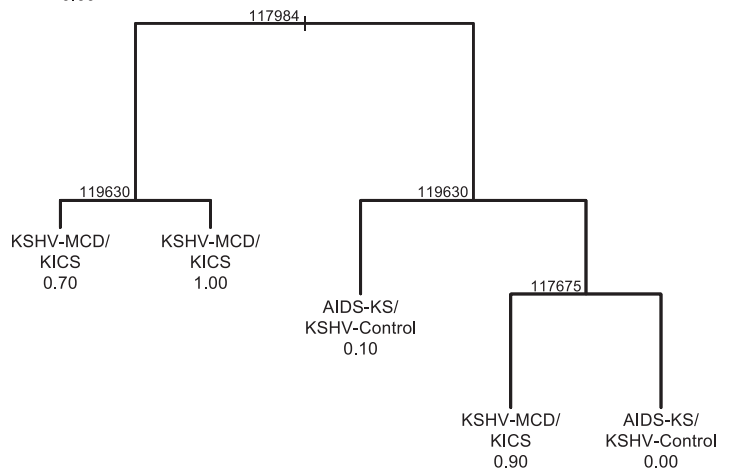

**Tree model 3**

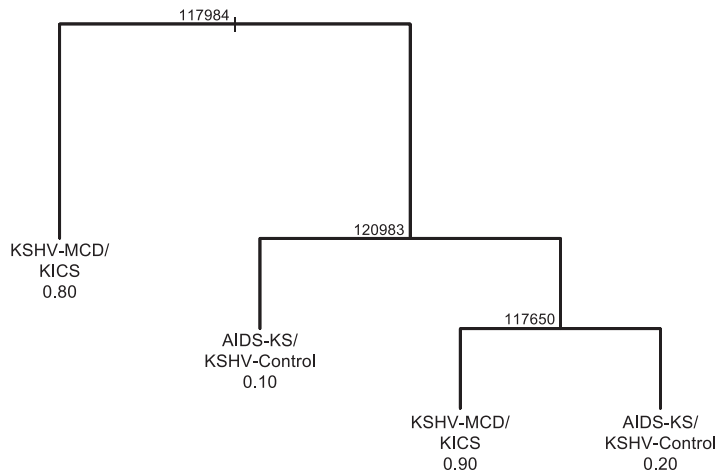

**Tree model 4**

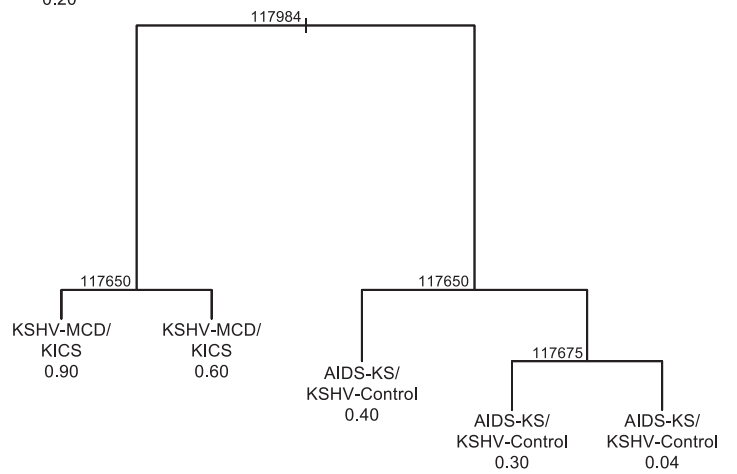

Supplement: supp_jis249_jis249supp.pdf [file supp_jis249_jis249supp.pdf]
